# Supplementary material for: Variations in IL-23 and IL-25 receptor gene structure, sequence and expression associated with the two disease forms of sheep paratuberculosis
Source: PubMed Central journal article supplement (PMC4748472; doi:10.1186/s13567-016-0314-4), 2016-02-09
Supplement: 13567_2016_314_MOESM1_ESM.pdf [file 13567_2016_314_MOESM1_ESM.pdf]

**Additional File 1      Primer sequences used for amplifying full length genes**

| Gene           | Primer     | Sequence (5'-3')          | Tm (°C) | Product size (bp) |
|----------------|------------|---------------------------|---------|-------------------|
| <i>IL23R</i>   | For        | AAATTGACAGGCAGCAGTGAGG    | 55      | 2030              |
|                | Rev        | TCTTCAGATTTCAAGGCAGGTTCT  |         |                   |
|                | For*       | AAGGAAGACGTGAGGCCGATAC    | 62      | 2000              |
|                | Rev*       | TTTCAAGGCAGGTTCTGACTACAC  |         |                   |
| <i>IL12RB1</i> | For        | ACCGGCAGCACAGAAGTTCA      | 55      | 2382              |
|                | Rev        | GCCCTCTCTGAACCTCACTG      |         |                   |
| <i>IL17RB</i>  | For        | AATAAGAGCGCGCGGCCGAAG     | 55      | 1630              |
|                | Rev        | ACTTCAGATTCTCACAGACACTT   |         |                   |
|                | For*       | CGGCCCGAAGCCGATCCGGA      | 60      | 1575              |
|                | Rev*       | GGGTCAGAAGGCTTTAGGG       |         |                   |
| <i>IL17RA</i>  | For        | TTCCCGTGGTTCACATCGAG      | 52      | 539               |
|                | Rev        | CAGGGTGACCGTGATGTGG       |         |                   |
|                | 3' RACE    | ACCGTCCACCACCTGCCTAAGCCCA | 60      |                   |
|                | 3' RACE*   | ACATCACCGTGGAGACCCTTGAGG  | 68      |                   |
|                | 5' RACE    | TCCATGGGGTGAAGCTCAGCCGCAG | 60      |                   |
|                | 5' RACE*   | CGTCAGGGATGGGCTTAGGCAGGT  | 68      |                   |
|                | 5' UTR For | CTGTCTGCAAATACAAGGTCTTG   | 52      | 399               |
|                | 5' UTR Rev | TCCACTCGATGTGAACCACG      |         |                   |
|                |            |                           |         |                   |
