# Supplementary material for: Variations in IL-23 and IL-25 receptor gene structure, sequence and expression associated with the two disease forms of sheep paratuberculosis
Source: PubMed Central journal article supplement (PMC4748472; doi:10.1186/s13567-016-0314-4), 2016-02-09
Supplement: 13567_2016_314_MOESM2_ESM.pdf [file 13567_2016_314_MOESM2_ESM.pdf]

**Additional File 2      Primer sequences used for RT-qPCR**

| Gene               | Primer | Sequence (5'-3')            | Tm (°C) | Product size (bp) |
|--------------------|--------|-----------------------------|---------|-------------------|
| <i>IL23R</i>       | For    | GGTGTACGTGAAGAGTTTAGAGACAG  | 62      | 131               |
|                    | Rev    | CAGTACATTTGAAGCTTGGACCC     |         |                   |
| <i>IL23R TV1</i>   | For    | ACAGGTCGTAAGAGAGCGACAAAG    | 58      | 120               |
|                    | Rev    | AATCCCTCCATGACACCAACTGAA    |         |                   |
| <i>IL23R TV2</i>   | For    | CATAGACACAAATTTAGAGACAGAA   | 60      | 129               |
|                    | Rev    | CAGTACATTTGAAGCTTGGACCC     |         |                   |
| <i>IL23R TV3</i>   | For    | ACTTGGAACGTAAGCTAAATTCCT    | 58      | 85                |
|                    | Rev    | AATTCTGACTGTTGCTCATATGTAA   |         |                   |
| <i>IL23R TV4</i>   | For    | TCCTGAAATAGACAACGGGAAAC     | 58      | 79                |
|                    | Rev    | AGAAGTACAGCATAACAGCAA       |         |                   |
| <i>IL23R TV5</i>   | For    | ACACCTTACTTCTGAATTTAAAAGAAG | 58      | 195               |
|                    | Rev    | CTGGGAGAATGATTTCTATCTCTG    |         |                   |
| <i>IL12RB1</i>     | For    | AGGATTCGGTGTCTGTGGACTGGA    | 61      | 110               |
|                    | Rev    | CAGACGCTTGGTTGCTGTCCTCCT    |         |                   |
| <i>IL12RB1 TV1</i> | For    | TATCCGTGCTCCACAATGTCCTCT    | 60      | 150               |
|                    | Rev    | GCAAAGCTGCTCTTGGACATCTTGA   |         |                   |
| <i>IL12RB1 TV2</i> | For    | CTGCTCTTCTCAAGGACCGGATGGG   | 60      | 82                |
|                    | Rev    | TTCAGGGGGGATGCACAAGAGGAGAA  |         |                   |
| <i>IL12RB1 TV3</i> | For    | CTGAGCTGGAGCAGCCCTGTGTGCAT  | 62      | 120               |
|                    | Rev    | GCTGCTCATGTAAGGCCACCTGCC    |         |                   |
| <i>IL12RB1 TV4</i> | For    | CACCATACCCAGATGCAGACTCA     | 61      | 187               |
|                    | Rev    | CGCAGAGCCTGTGGCAAAGA        |         |                   |
| <i>IL17RB</i>      | For    | CGGGCAGATGTGGACGTTTTTC      | 60      | 130               |
|                    | Rev    | TGAAGTTCACAGCCATGGAGGG      |         |                   |
| <i>IL17RB TV1</i>  | For    | GATCATGAGAGAAGTGTGCTGGG     | 58      | 118               |
|                    | Rev    | GAAGTAACAAACGTGCCTCCAGA     |         |                   |
| <i>IL17RB TV2</i>  | For    | CGGGCAGATGTGGACGTTTTTC      | 56      | 129               |
|                    | Rev    | TGAAGTTCACAGCCATGGAGGG      |         |                   |
| <i>IL17RB TV3</i>  | For    | TAACTCGAACTTCTGTGGTGGTCC    | 58      | 122               |
|                    | Rev    | GGTGCAGTGGGTCTTCAGTGAG      |         |                   |
| <i>IL17RA</i>      | For    | CACACTGAGGCATCATCACAAGC     | 60      | 144               |
|                    | Rev    | GAAGTTTCTGGATTGGTGGTTTGG    |         |                   |
| <i>SDHA</i>        | For    | ACCTGATGCTTTGTGCTCTGC       | 62      | 126               |
|                    | Rev    | CCTGGATGGGCTTGGAGTAA        |         |                   |
| <i>YWHAZ</i>       | For    | TGTAGGAGCCCGTAGGTCATC       | 60      | 101               |
|                    | Rev    | TCTCTCTGTATTCTCGAGCCATC     |         |                   |
