# Supplementary material for: Variations in IL-23 and IL-25 receptor gene structure, sequence and expression associated with the two disease forms of sheep paratuberculosis
Source: PubMed Central journal article supplement (PMC4748472; doi:10.1186/s13567-016-0314-4), 2016-02-09
Supplement: 13567_2016_314_MOESM3_ESM.pdf [file 13567_2016_314_MOESM3_ESM.pdf]

# Additional File 3 Derived protein sequences of cytokine receptor transcript variants

## A. IL-23R derived protein sequences

|         |                                                                                                                      |     |
|---------|----------------------------------------------------------------------------------------------------------------------|-----|
| IL23R   | MNQVTIHWDVVIALYIFFSWCHGGITNINCSGHIWVEPATIFRMGMNISIYCQAAIRNCQ                                                         | 60  |
| IL23Rv1 | MNQVTIHWDVVIALYIFFSWCHGGITNINCSGHIWVEPATIFKMGMNISIYCQAAIRNCQ                                                         | 60  |
| IL23Rv2 | MNQVTIHWDVVIALYIFFSWCHGGITNINCSGHIWVEPATIFKMGMNISIYCQAAIRNCQ                                                         | 60  |
| IL23Rv3 | MNQVTIHWDVVIALYIFFSWCHGGITNINCSGHIWVEPATIFKMGMNISIYCQAAIRNCQ                                                         | 60  |
| IL23Rv4 | MNQVTIHWDVVIALYIFFSWCHGGITNINCSGHIWVEPATIFKMGMNISIYCQAAIRNCQ                                                         | 60  |
| IL23Rv5 | MNQVTIHWDVVIALYIFFSWCHGGITNINCSGHIWVEPATIFKMGMNISIYCQAAIRNCQ                                                         | 60  |
|         | *****                                                                                                                |     |
| IL23R   | PRKLYFYKNGIKERFHITRINKTTARLWYNNFVEPQAFVYCTAECSTRYFPETLICGKDIS                                                        | 120 |
| IL23Rv1 | PRKLYFYKNGIKERFHITRINKTTARLWYNNFVEPQAFVYCTAECSTRYFSETLICGKDIS                                                        | 120 |
| IL23Rv2 | PRKLYFYKNGIKERFHITRINKTTARLWYNNFVEPQAFVYCTAECSTRYFPETLICGKDIS                                                        | 120 |
| IL23Rv3 | PRKLYFYKNGIKERFHITRINKTTARLWYNNFVEPQAFVYCTAECSTRYFPETLICGKDIS                                                        | 120 |
| IL23Rv4 | PRKLYFYKNGIKERFHITRINKTTARLWYNNFVEPQAFVYCTAECSTRYFPETLICGKDIS                                                        | 120 |
| IL23Rv5 | PRKLYFYKNGIKERFHITRINKTTARLWYNNFVEPQAFVYCTAECSTRYFPETLICGKDIS                                                        | 120 |
|         | *****                                                                                                                |     |
| IL23R   | SGYPPDVPDKVTCVIYEYSGNMTCTWNPGRPTYIDTKYVVYVKSLETEEEQEYLTSSYIN                                                         | 180 |
| IL23Rv1 | SGYPPDVPDKVTCVIYEYSGNMTCTWNPGRPTYIDTKYVVYVKSLETEEEQEYLTSSYIN                                                         | 180 |
| IL23Rv2 | SGYPPDVPDKVTCVIYEYSGNMTCTWNPGRPTYIDTN-----LETEEEQEYLTSSYIN                                                           | 173 |
| IL23Rv3 | SGYPPDVPDKVTCVIYEYSGNMTCTWNPGRPTYIDTKYVVYVKSLETEEEQEYLTSSYIN                                                         | 180 |
| IL23Rv4 | SGYPPDVPDKVTCVIYEYSGNMTCTWNPGRPTYIDTKYVVYVKSLETEEEQEYLTSSYIN                                                         | 180 |
| IL23Rv5 | SGYPPDVPDKVTCVIYEYSGNMTCTWNPGRPTYIDTKYVVYVKSLETEEEQEYLTSSYIN                                                         | 180 |
|         | *****                                                                                                                |     |
| IL23R   | ISTDSLQKGGKYLWVWQASNLVGLTEKSKQLQIHLDDIVIPSASIIISRAEDINTTVSKTVI                                                       | 240 |
| IL23Rv1 | ISTDSLQKGGKYLWVWQASNLVGLTEKSKQLQIHLDDIVIPSASIIISRAEDINTTVSKTVI                                                       | 240 |
| IL23Rv2 | ISTDSLQKGGKYLWVWQASNLVGLTEKSKQLQIHLDDIVIPSASIIISRAEDINTTVSKTVI                                                       | 233 |
| IL23Rv3 | ISTDSLQKGGKYLWVWQASNLVGLTEKSKQLQIHLDDIVIPSASIIISRAEDINTTVSKTVI                                                       | 240 |
| IL23Rv4 | ISTDSLQKGGKYLWVWQASNLVGLTEKSKQLQIHLDDIVIPSASIIISRAEDINTTVSKTVI                                                       | 240 |
| IL23Rv5 | ISTDSLQKGGKYLWVWQASNLVGLTEKSKQLQIHLDDIVIPSASIIISRAEDINTTVSKTVI                                                       | 240 |
|         | *****                                                                                                                |     |
| IL23R   | HWNSQTSIEKVSCEMRYKATTNQTWNVKEFDTNFTYEQQSEFYLPNATYVFQVRCQETG                                                          | 300 |
| IL23Rv1 | HWNSQTSIEKVSCEMRYKATTNQTWNVKEFDTNFTYEQQSEFYLPNATYVFQVRCQETG                                                          | 300 |
| IL23Rv2 | HWNSQTSIEKVSCEMRYKATTNQTWNTLKNLIPILHMSNSQNSTCSQ-----MLHTY                                                            | 285 |
| IL23Rv3 | HWNSQTSIEKVSCEMRYKATTNQTWNVS-----                                                                                    | 268 |
| IL23Rv4 | HWNSQTSIEKVSCEMRYKATTNQTWNVKEFDTNFTYEQQSEFYLPNATYVFQVRCQETG                                                          | 300 |
| IL23Rv5 | HWNSQTSIEKVSCEMRYKATTNQTWNVKEFDTNFTYEQQSEFYLPNATYVFQVRCQETG                                                          | 300 |
|         | *****                                                                                                                |     |
| IL23R   | KRYWQPWS <sup>1</sup> SPFFHKTPEIVPQVTMKS <sup>2</sup> FQHD <sup>3</sup> TQNSGLLIASIFKKHLTSDNGKQDIG <sup>4</sup> LLLG | 360 |
| IL23Rv1 | KRYWQPWS <sup>1</sup> SPFFHKTPEIVPQVTMKS <sup>2</sup> FQHD <sup>3</sup> TQNSGLLIASIFKKHLTSDNGKQDIG <sup>4</sup> LLLG | 360 |
| IL23Rv2 | FK-----                                                                                                              | 287 |
| IL23Rv3 | -----                                                                                                                | 268 |
| IL23Rv4 | KRYWQPWS <sup>1</sup> SPFFHKTPEI-----DNGKQDIG <sup>4</sup> LLLG                                                      | 330 |
| IL23Rv5 | KRYWQPWS <sup>1</sup> SPFFHKTPEIVPQVTMKS <sup>2</sup> FQHD <sup>3</sup> TQNSGLLIASIFKKHLTSELKEESYC----               | 356 |
|         |                                                                                                                      |     |
| IL23R   | MVFFAVMLSVLSLFGIFNKSIR <sup>1</sup> FGIKRRILLIPKWLYEDIPKLENSKVVKILQEKNEFM                                            | 420 |
| IL23Rv1 | MVFFAVMLSVLSLFGIFNKSIR <sup>1</sup> FGIKRRILLIPKWLYEDIPKLENSKVVKILQEKNEFM                                            | 420 |
| IL23Rv2 | -----                                                                                                                | 287 |
| IL23Rv3 | -----                                                                                                                | 268 |
| IL23Rv4 | MVFFAVMLSVLSLFGIFNKSIR <sup>1</sup> FGIKRRILLIPKWLYEDIPKLENSKVVKILQEKNEFM                                            | 390 |
| IL23Rv5 | -----                                                                                                                | 354 |
|         |                                                                                                                      |     |
| IL23R   | NNNSSEQVLYVDPVITEIEIILPEEKPIGYKKENNTGCLERKESLEKSLLTNTTVVYIPD                                                         | 480 |
| IL23Rv1 | NNNSSEQVLYVDPVITEIEIILPEEKPIGYKKENNTGCLERKESLEKSLLTNTTVVYIPD                                                         | 480 |
| IL23Rv2 | -----                                                                                                                | 287 |
| IL23Rv3 | -----                                                                                                                | 268 |
| IL23Rv4 | NNNSSEQVLYVDPVITEIEIILPEEKPIGYKKENNTGCLERKESLEKSLLTNTTVVYIPD                                                         | 450 |
| IL23Rv5 | -----                                                                                                                | 354 |

|         |                                                              |     |
|---------|--------------------------------------------------------------|-----|
| IL23R   | LNTGYKPKQISSFLPGGNHLRNDDETASSILEPPADSLNLGNNARFKKYPDFAFVSSTNS | 540 |
| IL23Rv1 | LNTGYKPKQISSFLPGGNHLRNDDETASSILEPPADSLNLGNNARFKKYPDFAFVSSTNS | 540 |
| IL23Rv2 | -----                                                        | 287 |
| IL23Rv3 | -----                                                        | 268 |
| IL23Rv4 | LNTGYKPKQISSFLPGGNHLRNDDETASSILEPPADSLNLGNNARFKKYPDFAFVSSTNS | 510 |
| IL23Rv5 | -----                                                        | 354 |

|         |                                                             |     |
|---------|-------------------------------------------------------------|-----|
| IL23R   | LSNTLFLEELSLILNQGECSPPDMQNSIEGETAMLLEDALLNETIPEQTLLPDEFVSLG | 600 |
| IL23Rv1 | LSNTLFLEELSLILNQGECSPPDMQNSIEGETAMLLEDALLNETIPEQTLLPDEFVSLG | 600 |
| IL23Rv2 | -----                                                       | 287 |
| IL23Rv3 | -----                                                       | 268 |
| IL23Rv4 | LSNTLFLEELSLILNQGECSPPDMQNSIEGETAMLLEDALLNETIPEQTLLPDEFVSLG | 570 |
| IL23Rv5 | -----                                                       | 356 |

|         |                             |     |
|---------|-----------------------------|-----|
| IL23R   | SMNKELPSINSYFPQNIRESHFNRFHS | 627 |
| IL23Rv1 | SMNKELPSINSYFPQNIRESHFNRFHS | 627 |
| IL23Rv2 | -----                       | 287 |
| IL23Rv3 | -----                       | 268 |
| IL23Rv4 | SMNKELPSINSYFPQNIRESHFNRFHS | 597 |
| IL23Rv5 | -----                       | 356 |

Bold, class 1 cytokine receptor activation motif  
 Box, R381Q variant site  
 Underline, transmembrane domain

### A. IL-12RB1 derived protein sequences

|           |                                                                 |     |
|-----------|-----------------------------------------------------------------|-----|
| IL12RB1   | 1 MGQWGFRLVAFLLLLCHRQGAACGTVGCCFQNPYPDADSGSASGPRAL              | 50  |
|           |                                                                 |     |
| IL12RB1v3 | 1 MGQWGFRLVAFLLLLCHRQGAACGTVGCCFQNPYPDADSGSASGPRAL              | 50  |
| IL12RB1   | 51 SCYRLSSSAGYECSWEYEGPAAGVIHFLRCCLQSGRCCFFATGSATKLQF           | 100 |
| IL12RB1v3 | 51 -----                                                        | 50  |
| IL12RB1   | 101 SDQDGISVLHNVTLWVESRAANRTEKSPNVTLNLYSSVKYDPPPGNIKVS          | 150 |
| IL12RB1v3 | 51 -----                                                        | 50  |
| IL12RB1   | 151 KSAGKLMEWETPARQDGAEVQFRHRTPGSPWKLGDGCRQDDAGFESCLC           | 200 |
| IL12RB1v3 | 51 -----                                                        | 50  |
| IL12RB1   | 201 PLEMDMAQEFQLRRRLGPGVPGGP <b>WSSWS</b> SPVICPPETPPQAEVRFSAEQ | 250 |
|           |                                                                 |     |
| IL12RB1v3 | 51 ----- <b>SWSS</b> SPVICPPETPPQAEVRFSAEQ                      | 74  |
| IL12RB1   | 251 LCPDGRRQVALHEQLPQLELPEGCLGPDPGMEVITYKIHLHMLSCKPCKTRA        | 300 |
|           |                                                                 |     |
| IL12RB1v3 | 75 LCPDGRRQVALHEQLPQLELPEGCLGPDPGMEVITYKIHLHMLSCKPCKTRA         | 124 |
| IL12RB1   | 301 KKTLLRKRKLVLSSAAYDLTIVSQNRFGGLGNQWTRIPACIHSEPGLLNI          | 350 |
|           |                                                                 |     |
| IL12RB1v3 | 125 KKTLLRKRKLVLSSAAYDLTIVSQNRFGGLGNQWTRIPACIHSEPGLLNI          | 174 |
| IL12RB1   | 351 SAGANGTTMHWPARAQGMRYCIEWQLQGQEEENLAACIVTAPQDADAAGMA         | 400 |
|           |                                                                 |     |
| IL12RB1v3 | 175 SAGANGTTMHWPARAQGMRYCIEWQLQGQEEENLAACIVTAPQDADAAGMA         | 224 |
| IL12RB1   | 401 THSWSQESGALAQKACYHIAIFASAHPEKLTWSTVLSTYHFGGNASAAG           | 450 |
|           |                                                                 |     |

|           |     |                                                     |     |
|-----------|-----|-----------------------------------------------------|-----|
| IL12RB1v3 | 225 | THSWSQESGALAQKACYHIAIFASAHPEKLTWSSTVLSTYHFGGNASAAG  | 274 |
| IL12RB1   | 451 | SPQHVSVRKLSQDSVSVSDWTSSLSTCPGVLKEYVVVFQEEDSNQASELH  | 500 |
| IL12RB1v3 | 275 | SPQHVSVRKLSQDSVSVSDWTSSLSTCPGVLKEYVVVFQEEDSNQASELH  | 324 |
| IL12RB1   | 501 | VKPTETQVTLQGLRAGTAYKVQVRADTAKWRGAWSQPLHFTIEVQVSELS  | 550 |
| IL12RB1v3 | 325 | VKPTETQVTLQGLRAGTAYKVQVRADTAKWRGAWSQPLHFTIEVQVSELS  | 374 |
| IL12RB1   | 551 | DLSIFLASLGSFVSILLGIFGYLSLNRAVRHLCPPPTPGASTAIKFSG    | 600 |
| IL12RB1v3 | 375 | DLSIFLASLGSFVSILLGIFGYLSLNRAVRHLCPPPTPGASTAIKFSG    | 424 |
| IL12RB1   | 601 | SQGKQVWQWTSPADFPPEEVS PHEALMVNISWEKGEADMGTGLTLKEKME | 650 |
| IL12RB1v3 | 425 | SQGKQVWQWTSPADFPPEEVS PHEALMVNISWEKGEADMGTGLTLKEKME | 474 |
| IL12RB1   | 651 | LPLRAPKPADTELPLKDRKQMCGCEAGALRPGWQDGLVEDSLAQVARP    | 700 |
| IL12RB1v3 | 475 | LPLRAPKPADTELPLKDRKQMCGCEAGALRPGWQDGLVEDSLAQVARP    | 524 |
| IL12RB1   | 701 | PLLLGGGLRQAPRFGSQGEAGTAASSYRED                      | 730 |
| IL12RB1v3 | 525 | PLLLGGGLRQAPRFGSQGEAGTAASSYRED                      | 554 |

**Bold**, class 1 cytokine receptor activation motif  
**Underline**, transmembrane domain

## B. IL-17RB derived protein sequences

|          |                                                                                                     |     |
|----------|-----------------------------------------------------------------------------------------------------|-----|
| IL17RB   | MLLVLLSLAALCWGAVPPEPTIQCGSEPGPSPEWVRHTLTPGDLRDLRVEPIKSSVDLE                                         | 60  |
| IL17RBv1 | MLLVLLSLAALCWGAVPPEPTIQCGSEPGPSPEWVRHTLTPGDLRDLRVEPIKSSVDLE                                         | 60  |
| IL17RBv2 | MLLVLLSLAALCWGAVPPEPTIQCGSEPGPSPEWVRHTLTPGDLRDLRVEPIKSSVDLE                                         | 60  |
| IL17RBv3 | MLLVLLSLAALCWGAVPPEPTIQCGSEPGPSPEWVRHTLTPGDLRDLRVEPIKSSVDLE                                         | 60  |
|          | *****                                                                                               |     |
| IL17RB   | DSSILMNISWILRADASIRLLKATKICVMGKSHFQSRSCIRCNYTQAFRTQTRHSGGKWT                                        | 120 |
| IL17RBv1 | DSSILMNISWILRADASIRLLKATKICVMGKSHFQSRSCIRCNYTQAFRTQTRHSGGKWT                                        | 120 |
| IL17RBv2 | DSSILMNISWILRADVDVFLHWF--SCRAEHSFLHWSP-----                                                         | 96  |
| IL17RBv3 | DSSILMNISWILRADVDVFLHWF--SCRAEHSFLHWSP-----                                                         | 96  |
|          | *****..: * * :* *:                                                                                  |     |
| IL17RB   | FSYIGFPVELNTVYFIGAHNIPNANMNEDGPSMAVNFTSPGCLDHVMKYKKKCI EAGSLW                                       | 180 |
| IL17RBv1 | FSYIGFPVELNTVYFIGAHNIPNANMNEDGPSMAVNFTSPGCLDHVMKYKKKCI EAGSLW                                       | 180 |
| IL17RBv2 | -----                                                                                               | 96  |
| IL17RBv3 | -----                                                                                               | 96  |
| IL17RB   | KPNITACKKSANTVEVNFTTSPGLDRYMALIQNTSVIGTSYVSEKELTRTSVVVHVTGES                                        | 240 |
| IL17RBv1 | KPNITACKKSANTVEVNFTTSPGLDRYMALIQNTSVIGTSYVSEKELTRTSVVVHVTGES                                        | 240 |
| IL17RBv2 | -----                                                                                               | 96  |
| IL17RBv3 | -----                                                                                               | 96  |
| IL17RB   | EGAVVQLTPYFHTCGNDCIRQRGTVVRCPQTGVSPQDHERSVLGGWLP LLLSALLVATWV                                       | 300 |
| IL17RBv1 | EGAVAQLTPYFHTCGNDCIRQRGTVVRCPQTGVSPQDHERSVLGGWLP LLLSALLVATWV                                       | 300 |
| IL17RBv2 | -----                                                                                               | 96  |
| IL17RBv3 | -----                                                                                               | 96  |
| IL17RB   | <u>LVAGIYLIWRHERIKKTSFSSTTLLPSL</u> <b>KVLV</b> <u>VYPSEIC</u> <b>FHHTVCYFTEFLQNR</b> <u>CRSEVI</u> | 360 |
| IL17RBv1 | <u>LVAGIYLIWRH</u> ----- <b>VCYFTEFLQNR</b> <u>CRSEVI</u>                                           | 328 |
| IL17RBv2 | -----                                                                                               | 96  |

|          |                                                                                     |     |
|----------|-------------------------------------------------------------------------------------|-----|
| IL17RBv3 | -----                                                                               | 96  |
| IL17RB   | <b>LEKWQKKKIAEMGPVQWLT</b> <u>TQKQAADKVI</u> <b>FLLSNDNTMCDGTCDKKEGGPCENSQDLFHL</b> | 420 |
| IL17RBv1 | <b>LEKWQKKKIAEMGPVQWLT</b> <u>TQKQAADKVI</u> <b>FLLSNDNTMCDGTCDKKEGGPCENSQDLFHL</b> | 388 |
| IL17RBv2 | -----                                                                               | 96  |
| IL17RBv3 | -----                                                                               | 96  |
| IL17RB   | <b>AFNLFCSDLRSQ</b> <u>THLRKYVVVY</u> <b>FREGDIKDSYSALSVCPTYRLTKDATDFCAELLHAKQH</b> | 480 |
| IL17RBv1 | <b>AFNLFCSDLRSQ</b> <u>THLRKYVVVY</u> <b>FREGDIKDSYSALSVCPTYRLTKDATDFCAELLHAKQH</b> | 448 |
| IL17RBv2 | -----                                                                               | 96  |
| IL17RBv3 | -----                                                                               | 96  |
| IL17RB   | VSVGRRSRARHYSCLSL                                                                   | 497 |
| IL17RBv1 | VSVGRRSRARHYSCLSL                                                                   | 465 |
| IL17RBv2 | -----                                                                               | 96  |
| IL17RBv3 | -----                                                                               | 96  |

Bold, SEFIR domain

Box, TRAF6 binding site

Underline, transmembrane domain
